# Supplementary material for: An encapsulation–reduction–catalysis confined all-in-one microcapsule for lithium–sulfur batteries displaying a high capacity and stable temperature tolerance
Source: Royal Society of Chemistry journal article supplement (doi:10.1039/d1qm00250c), 2021-01-01
Supplement: d1qm00250c1.pdf [file d1qm00250c1.pdf]

Electronic Supplementary Information (ESI) for Chemical Communications. This journal is  
(c) The Royal Society of Chemistry 2021.

Electronic Supplementary Information (ESI)

## **An encapsulation-reduction-catalysis confined all-in-one microcapsule for lithium-sulfur batteries displaying high capacity and stable temperature tolerance**

Mengfei Zhu,<sup>a,1</sup> Chaoyu Yang,<sup>b,1</sup> Tianli Han,<sup>a</sup> Chaoquan Hu,<sup>c,d,\*</sup> Yong Wu,<sup>a</sup>  
Ting Si,<sup>b,\*</sup> Jinyun Liu<sup>a,\*</sup>

### **Experimental**

#### **Material preparation**

All chemicals were purchased from Aladdin without further purification. 0.58 g of  $\text{Co}(\text{NO}_3)_2 \cdot 6\text{H}_2\text{O}$  and 0.5 g of polyvinylpyrrolidone were dissolved in 20 mL at a volumetric ratio of 1:1 in the mixture of ethanol and water. Then, 20 mL of 0.4 mol L<sup>-1</sup> sodium hydroxide aqueous solution was added under stirring to make the mixture changed from red to blue, and the reaction suspension was quickly transferred to an autoclave, heated for 12 h at 200 °C. The sample was filtered, washed, and dried.

Subsequently, 0.1 g of  $\text{Co}_3\text{O}_4$  and 4 g of *n*-hexadecane were dispersed ultrasonically for 20 min at room temperature to obtain a mixed solution A; 1.25 g of urea, 0.25 g of resorcinol, and 0.125 g of ammonium chloride were added in 50 mL of distilled water to obtain mixed solution B. Solution B was mixed with 25 mL of 2.5% methyl vinyl ether-maleic anhydride copolymer aqueous solution by mechanically

stirring, while adjusting the pH to 3.5 with triethanolamine. The solution A was added to the above solution, and the mechanical stirring was carried out for 0.5 h at a rate of 800 rpm. 3.2 g of formaldehyde aqueous solution with a mass concentration of 37% was added dropwise, and the stirring was continued for 2 h to obtain the microcapsules infilled with  $\text{Co}_3\text{O}_4$ .

The as-obtained sample was filtered, dried, and then carbonized at 800 °C in nitrogen gas for 5 h, and the heating rate was set to 3 °C min<sup>-1</sup>. The microcapsules and sulfur powders were mixed uniformly according to the mass ratio of 1:2. The CNTs/S-infilled microcapsules were obtained by fumigating sulfur in a tube furnace at 155 °C for 12 h under argon gas, and another rapid heat-treatment at 250 °C for 10 min to remove the sulfur on the external surface of microcapsules.

### **Characterization**

The samples were characterized by using scanning electron microscope (SEM, Hitachi S-8100, operated at 5 kV), transmission electron microscope (TEM, Hitachi HT7700), high-resolution transmission electron microscope (HRTEM, JEOL JEM-2010), energy dispersive x-ray spectroscopy (EDS), x-ray powder diffraction (XRD, D8 Advance), Raman spectrometer (Renishaw inVia), and x-ray photoelectron spectroscopy (XPS, ESCALAB 250). The sulfur content in the microcapsule was measured on a thermogravimetric analyzer (TGA, Setaram Labsys Evo SDT Q600). The specific surface area of microcapsule was tested on a Brunauer-Emmett-Teller (BET, Nova 2000E).

## **Electrochemical tests**

The microcapsules, conductive carbon black and polyvinylidene fluoride (mass ratio=65:25:10) were mixed for 5 h to form a slurry, and coated on an aluminum foil. After drying overnight in a vacuum oven at 60 °C, the foil was cut into small discs with a diameter of 12 mm by a microtome. Then, the CR2032 coin cell was assembled in a glove box (Mikrouna, Super 1220/750/900) in an argon gas. The lithium foil and the microporous polypropylene membrane were used as the counter electrode and diaphragm. The electrolyte was composed of DME and DOL (volume ratio 1:1), a mixture of 1.0 M LiTFSI and 1 wt% LiNO<sub>3</sub>. The electrochemical performance of the battery was tested by the Neware CT-3008 battery test system, the voltage range was set to 1.7 to 2.8 V. The cyclic voltammetry (CV) measurement was performed on an electrochemical workstation (CHI-660E) at a scan rate of 0.1 mV s<sup>-1</sup>. By using the same workstation, the electrochemical impedance spectroscopy (EIS) spectra of the cells were from 0.01 to 100 kHz.

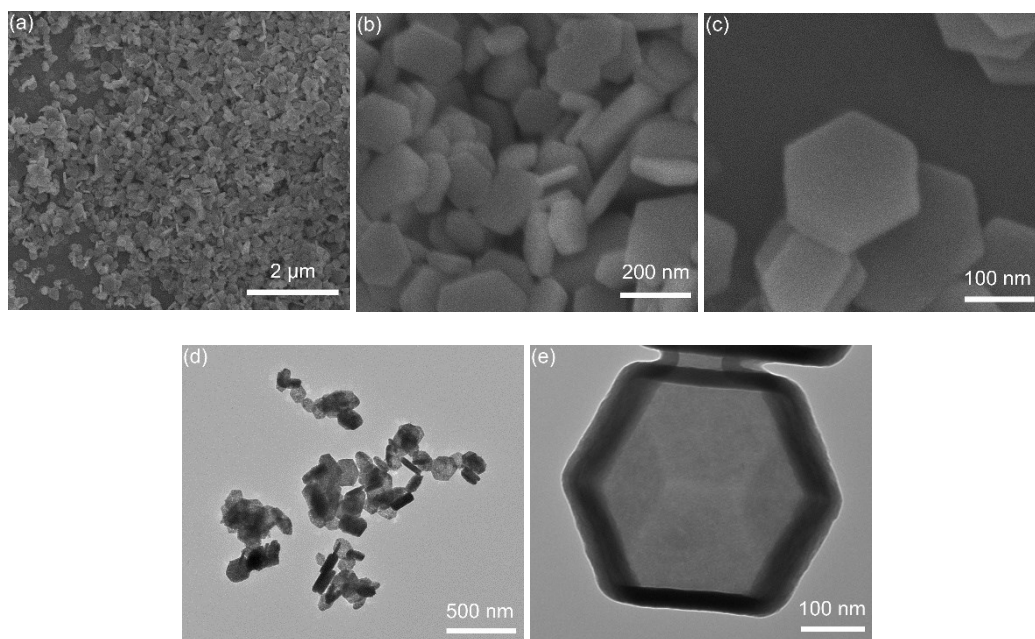

**Fig. S1.** (a-c) SEM and (d, e) TEM images of the  $\text{Co}_3\text{O}_4$  nanoboxes.

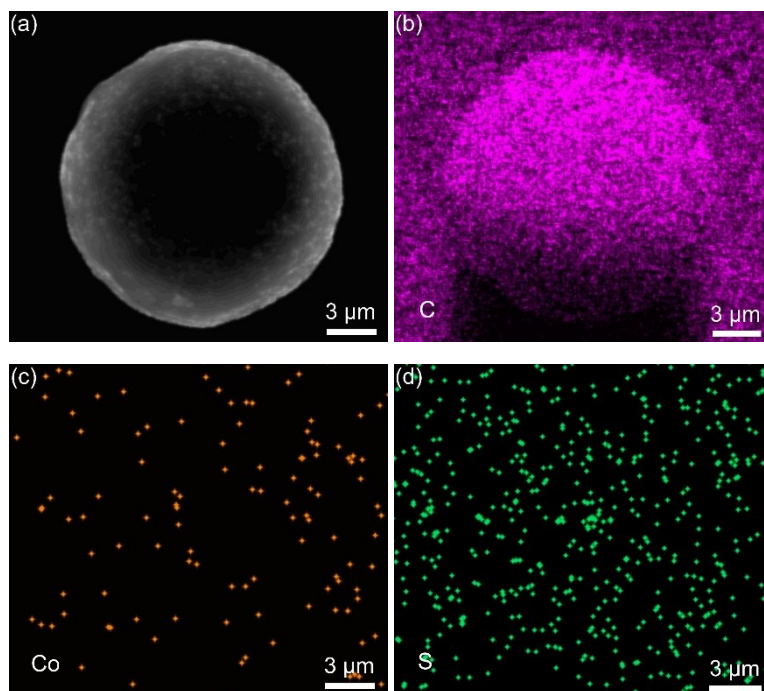

**Fig. S2.** (a) SEM image of a CNTs/S-infilled microcapsule. Elemental mapping images of (b) C, (c) Co, and (d) S.

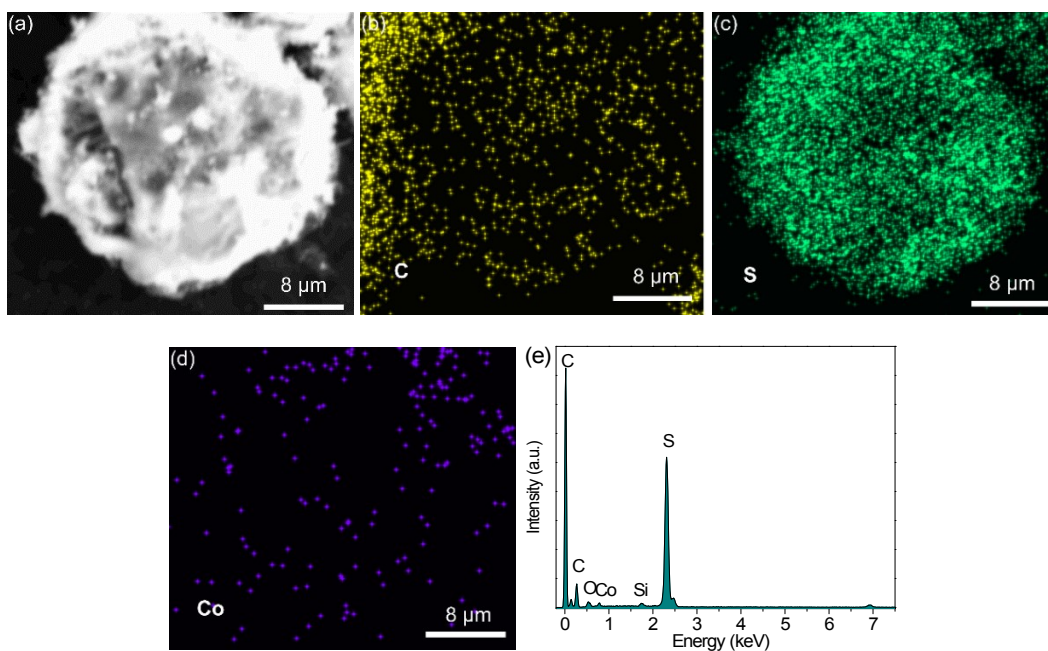

**Fig. S3.** (a) SEM image of a manually-broken CNTs/S-infilled microcapsule. Elemental mapping images of (b) C, (c) S, and (d) Co. (e) EDS spectrum.

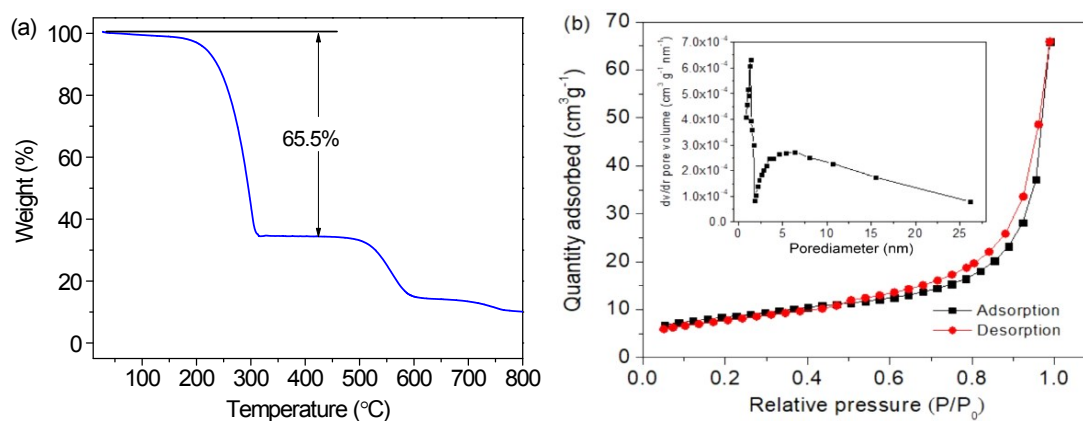

**Fig. S4.** (a) TGA curve of the CNTs/S-infilled microcapsules, (b) The N<sub>2</sub> adsorption-desorption isotherm of the microcapsules; and inset shows the pore-size distribution.

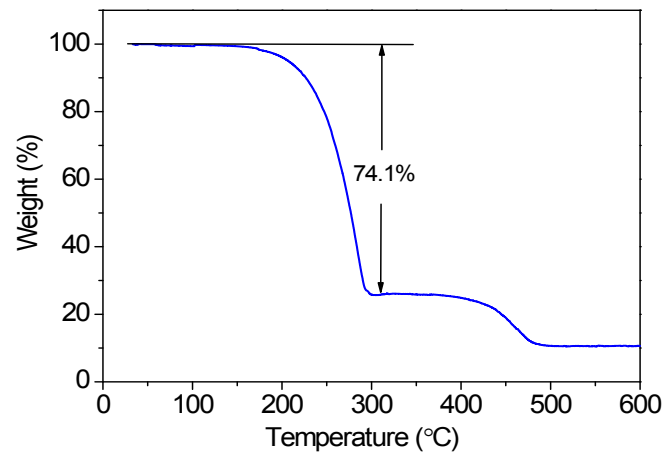

**Fig. S5.** TGA curve of the CNTs/S-infilled microcapsules with a sulfur content of 74.1%.

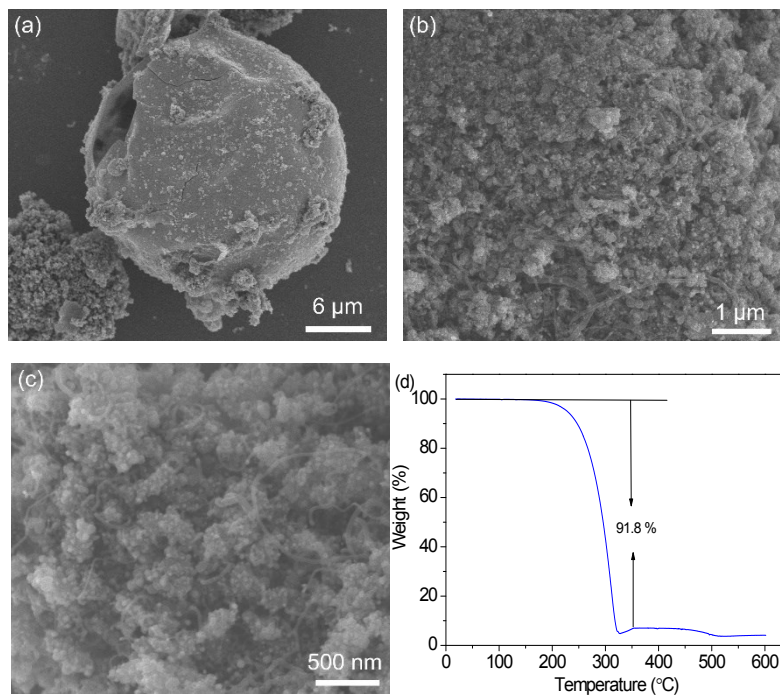

**Fig. S6.** (a-c) SEM images and (d) TGA curve of the CNTs/S-infilled microcapsules with a high sulfur content.

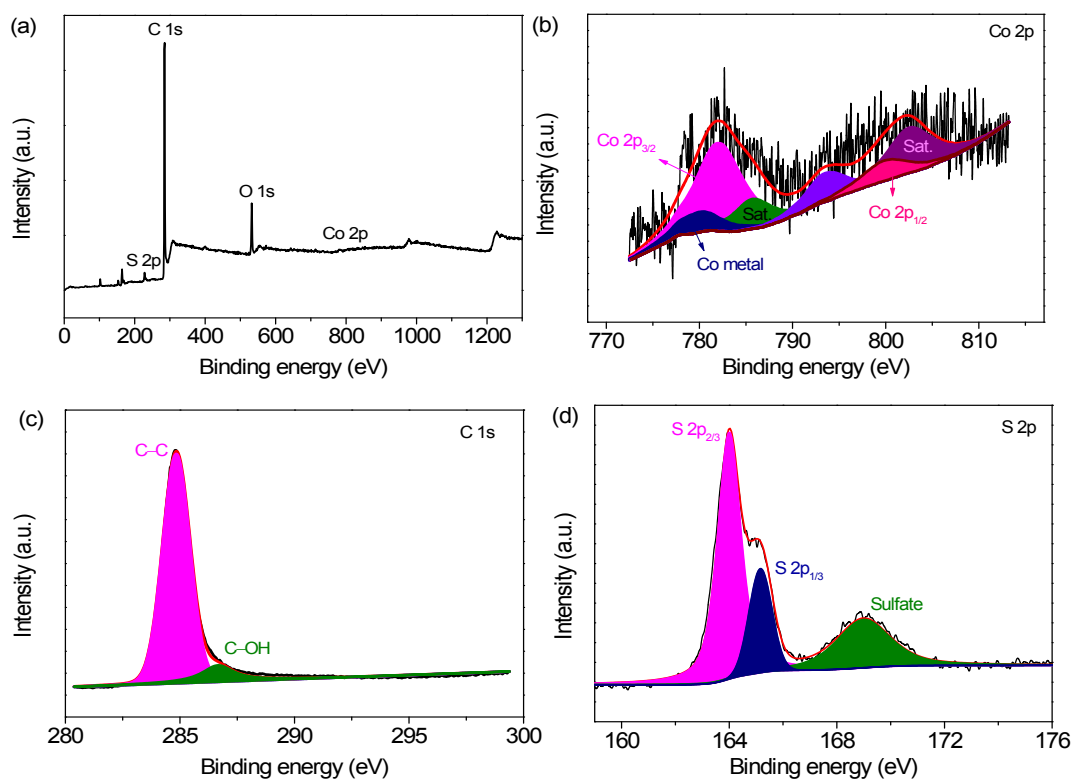

**Fig. S7.** XPS spectra of (a) Survey, (b) Co 2p, (c) C 1s, and (d) S 2p of the CNTs/S-infilled microcapsules.

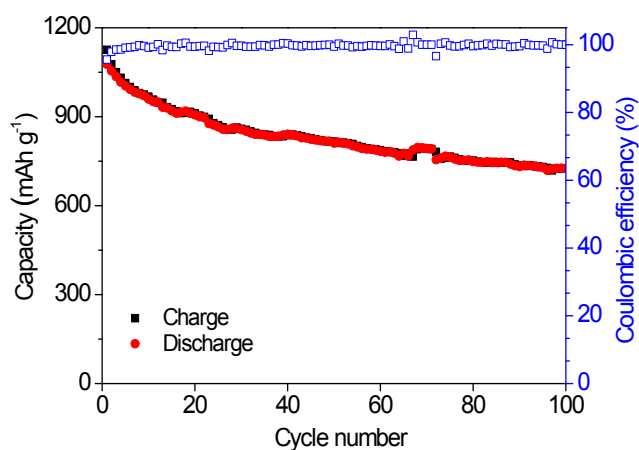

**Fig. S8.** Cycling performance of the CNTs/S-infilled microcapsules at 0.3 C.

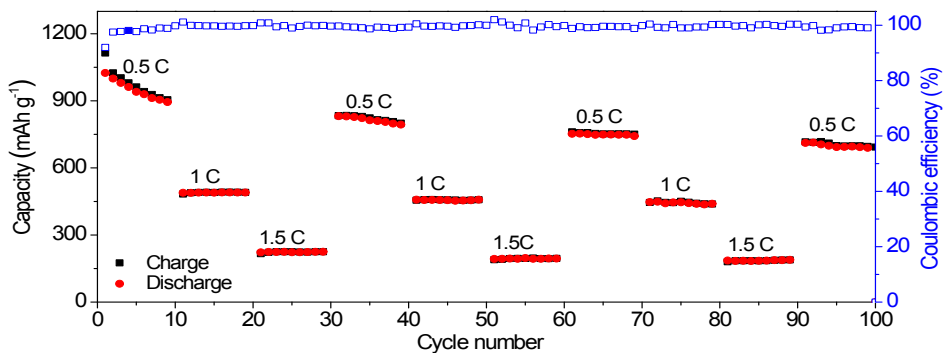

**Fig. S9.** Rate-performance of the CNTs/S-infilled microcapsules.

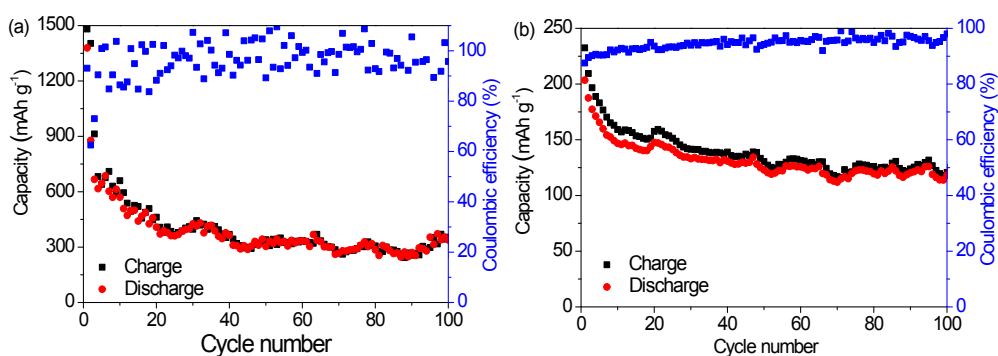

**Fig. S10.** Capacity and Coulombic efficiency of the CNTs/S composite cycling at 0.1 C under different temperatures: (a) 45 °C and (b) -5 °C.

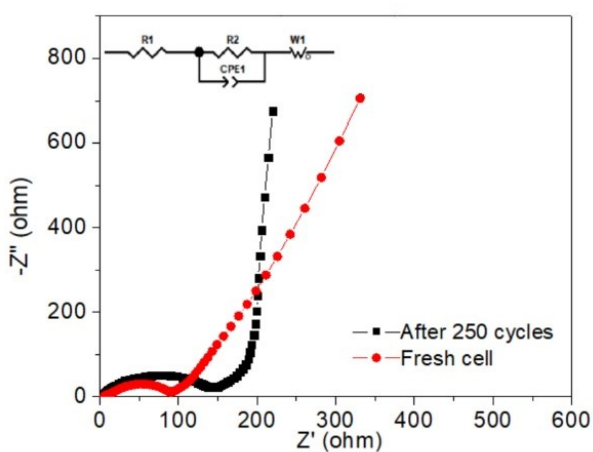

**Fig. S11.** Nyquist plots of the CNTs/S-infilled microcapsules before and after cycling at 0.1 C for 250 cycles.
